# Supplementary material for: Fluorescent silver nanoclusters embedded with polymer nanoparticles for sensing copper ions
Source: Royal Society of Chemistry journal article supplement (doi:10.1039/c3ay40252e), 2013-01-01
Supplement: c3ay40252e.pdf [file c3ay40252e.pdf]

## Electronic supplementary information

### Fluorescent Silver Nanoclusters Embedded Polymer Nanoparticles for Sensing Copper Ions

Yang Li,<sup>a</sup> Xumei Wang,<sup>a</sup> Gang Chen,<sup>a</sup> Shuping Xu,<sup>a\*</sup> Weiqing Xu<sup>a</sup>

<sup>a</sup> State Key Laboratory of Supramolecular Structure and Materials, Jilin University, Changchun 130012, People's Republic of China;

\* E-mail : [xusp@jlu.edu.cn](mailto:xusp@jlu.edu.cn)

1. GC-Mass spectrum of silver nanoclusters before and after the addition of copper ions.

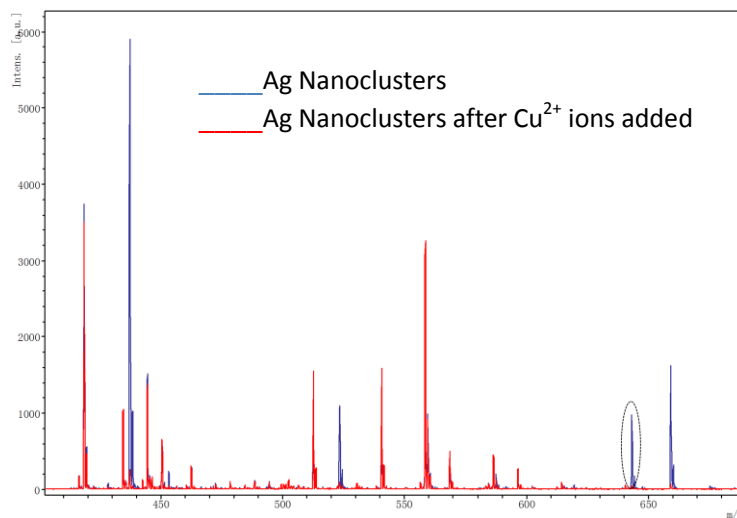

Fig.S1 GC-Mass spectrum of silver nanoclusters before (blue) and after (red) the addition of copper ions.

With the addition of copper ions, the copper ions first seized carboxyls which protected the stabilities of large nanoclusters, thus quenching the fluorescent and resulting in the blue-shift of the peak position. The changes of the peaks of Ag<sub>6</sub> before and after the addition of copper ions can be seen from the mass spectroscopy graph (Fig.S1). When copper ions are added, the peaks of Ag<sub>6</sub> almost

disappeared, and the others peaks showed little changes, which can explain that copper ions associated with carboxylates around bigger nanoparticles.

As we known, the diameters of the silver nanoclusters increased, during which the color of the solution was also found to change. The optical photos of the nanoclusters also reflect changes in the existence forms, which can be explained as different emission bodies present different colors. When copper ions were added, they were associated with carboxylates which protect the larger sized silver nanoclusters, such as Ag<sub>6</sub>. This causes the stability of Ag<sub>6</sub> decreasing and their fluorescence quenches as well. At the same time, the small sized silver nanoclusters (e.g. Ag<sub>2</sub> and Ag<sub>3</sub>) had little change and kept their fluorescence. Thus, the peak of silver nanoclusters blue-shifted in position and became narrower.
